# Supplementary material for: Recycling of Wastes Plastics and Tires from Automotive Industry
Source: MDPI journal article supplement (doi:10.3390/polym13132210), 2021-07-03
Supplement: s1 [file s1]

Table S1-12. Identified substances.

Table S1. Identified substances after pyrolysis (500 °C) of sample 1.

| RT (min) | Area (Ab*s) | Hit Name                                           | Mol Weight (amu) | CAS Number   |
|----------|-------------|----------------------------------------------------|------------------|--------------|
| 1.873    | 68263776    | 1,3-Butadiene                                      | 54.047           | 000106-99-0  |
| 1.946    | 185017493   | Isoprene                                           | 68.063           | 000078-79-5  |
| 2.208    | 21460590    | 1,3-Pentadiene, 3-methyl-, (E)-                    | 82.078           | 002787-43-1  |
| 2.266    | 54773257    | Benzene                                            | 78.047           | 000071-43-2  |
| 2.607    | 26654831    | Bicyclo[4.1.0]hept-2-ene                           | 94.078           | 002566-57-6  |
| 2.707    | 107730535   | Toluene                                            | 92.063           | 000108-88-3  |
| 3.031    | 10408376    | 4-Methyl-1,4-heptadiene                            | 110.110          | 013857-55-1  |
| 3.100    | 65428323    | Cyclohexene, 4-ethenyl-                            | 108.094          | 000100-40-3  |
| 3.220    | 11878612    | Tricyclo[3.2.1.0(1,5)]octane                       | 108.094          | 019074-25-0  |
| 3.320    | 32465156    | Ethylbenzene                                       | 106.078          | 000100-41-4  |
| 3.357    | 50307834    | o-Xylene                                           | 106.078          | 000095-47-6  |
| 3.540    | 266438146   | Styrene                                            | 104.063          | 000100-42-5  |
| 3.797    | 63594874    | Benzene, (1-methylethyl)-                          | 120.094          | 000098-82-8  |
| 3.949    | 6733814     | 7-Methylenebicyclo[4.2.0]octane                    | 122.110          | 1000211-11-2 |
| 3.996    | 16198667    | Benzene, 2-propenyl-                               | 118.078          | 000300-57-2  |
| 4.075    | 32144657    | Cyclohexene, 4-ethenyl-1,4-dimethyl-               | 136.125          | 001743-61-9  |
| 4.132    | 16615373    | Benzene, 1,2,4-trimethyl-                          | 120.094          | 000095-63-6  |
| 4.300    | 199762125   | .alpha.-Methylstyrene                              | 118.078          | 000098-83-9  |
| 4.473    | 9726871     | 3-Carene                                           | 136.125          | 013466-78-9  |
| 4.541    | 35713902    | Bicyclo[4.2.0]oct-1-ene, 7-endo-ethenyl-           | 134.110          | 1000142-18-3 |
| 4.672    | 27221560    | 2,6-Dimethyl-1,3,5,7-octatetraene, E,E-            | 134.110          | 000460-01-5  |
| 4.725    | 138869403   | D-Limonene                                         | 136.125          | 005989-27-5  |
| 4.809    | 9879346     | Benzene, cyclopropyl-                              | 118.078          | 000873-49-4  |
| 4.908    | 7739984     | 1-Propyne, 3-phenyl-                               | 116.063          | 010147-11-2  |
| 4.971    | 11726505    | Benzenepropanal                                    | 134.073          | 000104-53-0  |
| 5.270    | 19823854    | Benzene, (2-methyl-1-propenyl)-                    | 132.094          | 000768-49-0  |
| 5.485    | 14473863    | 1,3,8-p-Menthatriene                               | 134.110          | 018368-95-1  |
| 5.600    | 12736984    | Cyclohexane, 1,2,4-triethenyl-                     | 162.141          | 002855-27-8  |
| 5.715    | 5598955     | 1,5,5-Trimethyl-6-methylene-cyclohexene            | 136.125          | 000514-95-4  |
| 5.757    | 4585248     | Benzene, (2-methyl-2-propenyl)-                    | 132.094          | 003290-53-7  |
| 5.810    | 5887439     | Benzene, 4-pentenyl-                               | 146.110          | 001075-74-7  |
| 5.873    | 17193083    | 2-Methyl-7-exo-vinylbicyclo[4.2.0]oct-1(2)-ene     | 148.125          | 107914-89-6  |
| 5.936    | 7001450     | 1,4,8-Dodecatriene, (E,E,E)-                       | 162.141          | 024252-85-5  |
| 5.957    | 6364632     | Cyclopropane, 1-butyldiene-2-(2-butylcyclopropyl)- | 192.188          | 091509-01-2  |
| 6.103    | 8719355     | Cyclooctene, 5,6-diethenyl-, cis-                  | 162.141          | 053264-72-5  |
| 6.177    | 3289764     | Benzene, (1-methyl-1-butenyl)-                     | 146.110          | 053172-84-2  |
| 6.213    | 9527401     | Benzene, (2-cyclopropylethenyl)-                   | 144.094          | 1000142-01-6 |
| 6.282    | 7453430     | 1H-Indene, 1,1-dimethyl-                           | 144.094          | 018636-55-0  |
| 6.727    | 9686048     | Benzene, cyclohexyl-                               | 160.125          | 000827-52-1  |
| 6.785    | 6248205     | 8-Methylene-3-oxatricyclo[5.2.0.0(2,4)]nonane      | 136.089          | 1000211-14-3 |
| 7.167    | 3124065     | Benzene, 1-cyclopenten-1-yl-                       | 144.094          | 000825-54-7  |
| 7.351    | 2876013     | Benzene, 1-hexynyl-                                | 158.110          | 001129-65-3  |
| 7.461    | 3936689     | Benzene, 3-cyclohexen-1-yl-                        | 158.110          | 004994-16-5  |

**Table S2.** Identified substances after pyrolysis (500°C) of sample 2.

| RT (min) | Area (Ab*s) | Hit Name                                          | Mol Weight (amu) | CAS Number  |
|----------|-------------|---------------------------------------------------|------------------|-------------|
| 1.863    | 85930369    | 1,3-Butadiene                                     | 54.047           | 000106-99-0 |
| 1.931    | 140838265   | Isoprene                                          | 68.063           | 000078-79-5 |
| 2.203    | 15388189    | (Z),(Z)-2,4-Hexadiene                             | 82.078           | 006108-61-8 |
| 2.261    | 44870182    | Benzene                                           | 78.047           | 000071-43-2 |
| 2.596    | 19539801    | Cyclopentane, 1,3-bis(methylene)-                 | 94.078           | 059219-48-6 |
| 2.707    | 110876274   | Toluene                                           | 92.063           | 000108-88-3 |
| 2.906    | 9890016     | 9,12-Octadecadien-1-ol, (Z,Z)-                    | 266.261          | 000506-43-4 |
| 3.089    | 74511434    | Cyclohexene, 4-ethenyl-                           | 108.094          | 000100-40-3 |
| 3.210    | 8056919     | Tricyclo[3.2.1.0(1,5)]octane                      | 108.094          | 019074-25-0 |
| 3.315    | 34681687    | Benzene, 1,3-dimethyl-                            | 106.078          | 000108-38-3 |
| 3.341    | 34863488    | Ethylbenzene                                      | 106.078          | 000100-41-4 |
| 3.530    | 286432746   | Styrene                                           | 104.063          | 000100-42-5 |
| 3.797    | 12096562    | 2-Nonen-4-yne, (Z)-                               | 122.110          | 056392-46-2 |
| 3.991    | 11276725    | Benzene, 2-propenyl-                              | 118.078          | 000300-57-2 |
| 4.069    | 31724311    | Cyclohexene, 1-methyl-4-(1-methylethenyl)-, (S)-  | 136.125          | 005989-54-8 |
| 4.295    | 28310930    | .alpha.-Methylstyrene                             | 118.078          | 000098-83-9 |
| 4.405    | 9498172     | cis-2,6-Dimethyl-2,6-octadiene                    | 138.141          | 002492-22-0 |
| 4.536    | 3637846     | 3-Methylenecycloheptene                           | 108.094          | 034564-56-2 |
| 4.557    | 6399403     | 1,5-Hexadiene, 2,5-dimethyl-3-methylene-          | 122.110          | 059131-13-4 |
| 4.709    | 92495699    | D-Limonene                                        | 136.125          | 005989-27-5 |
| 4.803    | 3690886     | 1-(2-Methylphenyl)ethanol                         | 136.089          | 007287-82-3 |
| 4.966    | 3620518     | Benzenepropanal                                   | 134.073          | 000104-53-0 |
| 5.265    | 5522385     | Benzene, 1-methyl-4-(1-methylethenyl)-            | 132.094          | 001195-32-0 |
| 5.480    | 4000302     | Cyclohexane, 1,2,4-triethenyl-                    | 162.141          | 002855-27-8 |
| 5.600    | 4288470     | 1,2-Di(prop-2-ynyl)cyclohexane                    | 160.125          | 220078-91-1 |
| 5.810    | 3824403     | Benzene, 4-pentenyl-                              | 146.110          | 001075-74-7 |
| 5.878    | 8066250     | 2-Methyl-7-exo-vinylbicyclo[4.2.0]oct-1(2)-ene    | 148.125          | 107914-89-6 |
| 5.930    | 1692792     | 10-Oxatricyclo[4.2.1.1(3,9)]dec-4-ene, 9-ethenyl- | 162.104          | 138146-11-9 |
| 5.951    | 2048955     | n.i.                                              | n.i.             | n.i.        |
| 6.098    | 3415552     | Cyclooctene, 5,6-diethenyl-, cis-                 | 162.141          | 053264-72-5 |
| 6.208    | 4499519     | Benzene, 1-cyclopenten-1-yl-                      | 144.094          | 000825-54-7 |
| 6.282    | 2513420     | 1H-Indene, 1-ethenyl-2,3-dihydro-                 | 144.094          | 051783-46-1 |
| 6.418    | 2932538     | Benzene, 1-(1-methylethenyl)-3-(1-methylethyl)-   | 160.125          | 001129-29-9 |
| 6.517    | 3377675     | Benzene, cyclopentyl-                             | 146.110          | 000700-88-9 |
| 6.727    | 4323310     | Benzene, 4-hexenyl-                               | 160.125          | 023086-43-3 |
| 6.785    | 2135737     | 6-[(1Z)-1,3-Butadienyl]-1,4-cycloheptadiene       | 146.110          | 084899-15-0 |
| 6.863    | 1824347     | Benzene, cyclohexyl-                              | 160.125          | 000827-52-1 |
| 7.351    | 2596680     | Benzene, 1-hexynyl-                               | 158.110          | 001129-65-3 |
| 7.461    | 5243797     | Benzene, 3-cyclohexen-1-yl-                       | 158.110          | 004994-16-5 |

**Table S3.** Identified substances after pyrolysis (500 °C) of sample 3.

| RT (min) | Area (Ab*s) | Hit Name                                           | Mol Weight (amu) | CAS Number  |
|----------|-------------|----------------------------------------------------|------------------|-------------|
| 2.125    | 106718335   | 2-Propenoic acid, methyl ester                     | 86.037           | 000096-33-3 |
| 2.392    | 1208244534  | Methyl methacrylate                                | 100.052          | 000080-62-6 |
| 2.618    | 2076021     | 2-Propenoic acid, 2-methyl-, 2-hydroxypropyl ester | 144.079          | 000923-26-2 |

|        |          |                                                                              |         |              |
|--------|----------|------------------------------------------------------------------------------|---------|--------------|
| 2.728  | 11928349 | Butanoic acid, 2-methyl-, methyl ester                                       | 116.084 | 000868-57-5  |
| 2.827  | 4705501  | 3-Butenoic acid, 3-methyl-, methyl ester                                     | 114.068 | 025859-52-3  |
| 2.880  | 4729123  | Butanoic acid, 2-methylene-, methyl ester                                    | 114.068 | 002177-67-5  |
| 3.881  | 7277340  | 4-Pentenoic acid, 2,4-dimethyl-, methyl ester                                | 142.099 | 034998-29-3  |
| 4.295  | 7043519  | 2,2,3,3-Tetramethylcyclopropanecarboxylic acid, 4-methylcyclohexyl ester     | 238.193 | 1000221-97-5 |
| 4.772  | 7968212  | 6-Methyl-3,5-heptadiene-2-one                                                | 124.089 | 001604-28-0  |
| 4.814  | 7176857  | Cyclopentanecarboxylic acid, 3-methyl-4-methylene-, methyl ester             | 154.099 | 062185-62-0  |
| 4.887  | 2981775  | Cyclopentanecarboxylic acid, 3-methyl-4-methylene-, methyl ester, trans-     | 154.099 | 087753-70-6  |
| 5.003  | 5192455  | Butanedioic acid, methyl-, dimethyl ester                                    | 160.074 | 001604-11-1  |
| 5.197  | 2418244  | Cyclohexanecarboxylic acid, 1-ethyl-, methyl ester                           | 170.131 | 004630-81-3  |
| 5.307  | 12776685 | Butanedioic acid, methylene-, dimethyl ester                                 | 158.058 | 000617-52-7  |
| 5.574  | 2258107  | Cyclooctane                                                                  | 112.125 | 000292-64-8  |
| 6.287  | 5665304  | Pentanedioic acid, 2,4-dimethyl-, dimethyl ester                             | 188.105 | 002121-68-8  |
| 6.371  | 27361225 | 1,2-Cyclopentanedicarboxylic acid, dimethyl ester, trans-(./-.)-             | 186.089 | 080656-12-8  |
| 6.560  | 2071417  | 2-Aminoimidazole-4-carboxylic acid, methyl ester                             | 141.054 | 1000129-59-6 |
| 6.769  | 34203042 | 3-Furancarboxylic acid, 2-methyl-, methyl ester                              | 140.047 | 006141-58-8  |
| 6.989  | 299851   | 2-Pentenedioic acid, dimethyl ester                                          | 158.058 | 005164-76-1  |
| 7.252  | 26283687 | 2-Pentenoic acid, 4-methyl-                                                  | 114.068 | 010321-71-8  |
| 7.351  | 8805730  | Hexanedioic acid, 2-methyl-5-methylene-, dimethyl ester                      | 200.105 | 004513-62-6  |
| 7.466  | 6325673  | 2,3,4,5-Tetramethylcyclopent-2-en-1-ol                                       | 140.120 | 082061-20-9  |
| 7.519  | 12813660 | 2-Cyclopentene-1-carboxylic acid, 1-methyl-, methyl ester                    | 140.084 | 068317-73-7  |
| 7.582  | 9054926  | 4,4-Dimethoxy-2,5-cyclohexadien-1-one                                        | 154.063 | 000935-50-2  |
| 7.697  | 4426045  | Cyclopentanecarboxylic acid, 2-methyl-4-methylene-, methyl ester             | 154.099 | 074764-24-2  |
| 7.739  | 4841611  | 3-Cyclopentene-1,2-dicarboxylic acid, 4-methyl-, dimethyl ester, trans-      | 198.089 | 080137-87-7  |
| 7.886  | 4376414  | 3-Oxabicyclo[3.3.0]octan-2-one, 6-methylene-7-methyl-                        | 152.084 | 1000155-60-1 |
| 8.913  | 1857879  | 1-Buten-1-ol, 2-methyl-4-(2,6,6-trimethyl-1-cyclohexen-1-yl)-, formate, (E)- | 236.178 | 021730-91-6  |
| 10.517 | 2496541  | Phenol, 2-(1,1-dimethylethyl)-4-methyl-                                      | 164.120 | 002409-55-4  |
| 11.099 | 17955641 | 3-Ethoxybenzhydrazide                                                        | 180.090 | 027830-16-6  |

**Table S4.** Identified substances after pyrolysis (500 °C) of sample 4.

| RT (min) | Area (Ab*s) | Hit Name                                                                 | Mol Weight (amu) | CAS Number   |
|----------|-------------|--------------------------------------------------------------------------|------------------|--------------|
| 2.141    | 10317856    | Methyl propionate                                                        | 88.052           | 000554-12-1  |
| 2.387    | 1100051789  | Methyl methacrylate                                                      | 100.052          | 000080-62-6  |
| 2.717    | 9138280     | Butanoic acid, 2-methyl-, methyl ester                                   | 116.084          | 000868-57-5  |
| 2.817    | 2916135     | 3-Butenoic acid, 3-methyl-, methyl ester                                 | 114.068          | 025859-52-3  |
| 2.869    | 3117347     | 2-Butenoic acid, 2-methyl-, methyl ester, (Z)-                           | 114.068          | 005953-76-4  |
| 3.876    | 5114053     | 4-Pentenoic acid, 2,4-dimethyl-, methyl ester                            | 142.099          | 034998-29-3  |
| 4.290    | 5840215     | 2,2,3,3-Tetramethylcyclopropanecarboxylic acid, 4-methylcyclohexyl ester | 238.193          | 1000221-97-5 |

|        |          |                                                                                                                          |         |              |
|--------|----------|--------------------------------------------------------------------------------------------------------------------------|---------|--------------|
| 4.809  | 3878123  | Cyclopentanecarboxylic acid, 3-methyl-4-methylene-, methyl ester, cis-                                                   | 154.099 | 087753-69-3  |
| 5.008  | 3539346  | Butanedioic acid, methyl-, dimethyl ester                                                                                | 160.074 | 001604-11-1  |
| 5.191  | 2117503  | 3-Isopropyl-5-methyl-hex-4-en-2-one                                                                                      | 154.136 | 077142-85-9  |
| 5.307  | 7265531  | Butanedioic acid, methylene-, dimethyl ester                                                                             | 158.058 | 000617-52-7  |
| 6.051  | 1365757  | Pentanedioic acid, 2,4-dimethyl-, dimethyl ester                                                                         | 188.105 | 002121-68-8  |
| 6.124  | 5590825  | 1-Dodecene                                                                                                               | 168.188 | 000112-41-4  |
| 6.434  | 2672353  | 2,4-Octadienoic acid, 7-hydroxy-, methyl ester, [R-(E,E)]-                                                               | 170.094 | 069734-24-3  |
| 6.947  | 5504482  | Dimethyl ethylidenemalonate                                                                                              | 158.058 | 017041-60-0  |
| 7.251  | 16236166 | Cyclopropanecarboxylic acid, methyl ester                                                                                | 100.052 | 002868-37-3  |
| 7.304  | 2478301  | 2-Pentenoic acid, 4-methyl-                                                                                              | 114.068 | 010321-71-8  |
| 7.356  | 5159486  | Hexanedioic acid, 2-methyl-5-methylene-, dimethyl ester                                                                  | 200.105 | 004513-62-6  |
| 7.414  | 20372248 | 5-Methyl-2-ethenyl-cyclohexane-1-carboxylic acid                                                                         | 168.115 | 1000144-53-6 |
| 7.582  | 5581136  | 4,4-Dimethoxy-2,5-cyclohexadien-1-one                                                                                    | 154.063 | 000935-50-2  |
| 7.697  | 2832866  | 2-Propanone, 1-(1-cyclohexen-1-yl)-3-ethoxy-                                                                             | 182.131 | 051149-72-5  |
| 8.012  | 3997775  | Cyclopentanecarboxylic acid, 2-methyl-4-methylene-, methyl ester                                                         | 154.099 | 074764-24-2  |
| 10.847 | 4375681  | 1H-Perimidine-1-ethanol                                                                                                  | 212.095 | 020957-13-5  |
| 11.099 | 13665983 | 2-Naphthalenemethanol, 2,3,4,4a,5,6,7,8-octahydro-.al-pha.,.alpha.,4a,8-tetramethyl-, [2R-(2.al-pha.,4a.beta.,8.beta.)]- | 222.198 | 063891-61-2  |

**Table S5.** Identified substances after pyrolysis (500°C) of sample 5.

| RT (min) | Area (Ab*s) | Hit Name                                                     | Mol Weight (amu) | CAS Number   |
|----------|-------------|--------------------------------------------------------------|------------------|--------------|
| 1.989    | 65932388    | 1-Butanol, 2-methyl-                                         | 88.089           | 000137-32-6  |
| 2.114    | 132870613   | 1-Pentene, 2-methyl-                                         | 84.094           | 000763-29-1  |
| 2.272    | 56179810    | (Z),(Z)-2,4-Hexadiene                                        | 82.078           | 006108-61-8  |
| 2.382    | 40937528    | 1-Heptene                                                    | 98.110           | 000592-76-7  |
| 2.675    | 47220106    | 1-Heptene, 4-methyl-                                         | 112.125          | 013151-05-8  |
| 2.733    | 10123869    | Heptane, 4-methyl-                                           | 114.141          | 000589-53-7  |
| 2.796    | 42621680    | 2,4-Dimethyl-1-hexene                                        | 112.125          | 016746-87-5  |
| 2.979    | 22239610    | 2,2-Dimethyl-3-heptene trans                                 | 126.141          | 019550-75-5  |
| 3.168    | 466355602   | 2,4-Dimethylhept-1-ene                                       | 126.141          | 1000411-46-2 |
| 3.299    | 25491289    | Cyclohexane, 1,3,5-trimethyl-, (1.alpha.,3.al-pha.,5.beta.)- | 126.141          | 001795-26-2  |
| 3.404    | 17715256    | Cyclohexene, 3,3,5-trimethyl-                                | 124.125          | 000503-45-7  |
| 3.530    | 23122796    | Ethyl 2-ethylbutyl carbonate                                 | 174.126          | 1000373-79-7 |
| 3.545    | 30985435    | 1-Dodecanone, 1-cyclopropyl-                                 | 224.214          | 019873-44-0  |
| 3.708    | 28985377    | 2-Cyclohexen-1-one, 4,5-dimethyl-                            | 124.089          | 005715-25-3  |
| 4.017    | 6542540     | Cyclodecane                                                  | 140.157          | 000293-96-9  |
| 4.075    | 4969275     | Nonane, 4-methyl-                                            | 142.172          | 017301-94-9  |
| 4.285    | 5447267     | 2-Methyl-1-nonene                                            | 140.157          | 002980-71-4  |
| 4.337    | 11151677    | 1-Decene                                                     | 140.157          | 000872-05-9  |
| 4.368    | 15063904    | 2-Decene, 4-methyl-, (Z)-                                    | 154.172          | 074630-30-1  |
| 4.400    | 16646756    | 1,1,4-Trimethylcyclohexane                                   | 126.141          | 007094-27-1  |
| 4.494    | 6655241     | Octane, 3,3-dimethyl-                                        | 142.172          | 004110-44-5  |
| 4.531    | 6802722     | Heptane, 5-ethyl-2-methyl-                                   | 142.172          | 013475-78-0  |

|       |          |                                                         |         |              |
|-------|----------|---------------------------------------------------------|---------|--------------|
| 4.725 | 4073142  | 4-Decene, 5-methyl-, (E)-                               | 154.172 | 062338-51-6  |
| 4.804 | 3800513  | Cyclohexane, 1,1-dimethyl-2-propyl-                     | 154.172 | 081983-71-3  |
| 4.856 | 5322938  | Cyclopentane, 1,1,2-trimethyl-                          | 112.125 | 004259-00-1  |
| 4.950 | 7841361  | Cyclopentane, 1-ethyl-1-methyl-                         | 112.125 | 016747-50-5  |
| 5.081 | 3100020  | 2,6-Octadienal, 3,7-dimethyl-, (Z)-                     | 152.120 | 000106-26-3  |
| 5.139 | 51405343 | Cyclohexane, 1,1,3,5-tetramethyl-, trans-               | 140.157 | 050876-31-8  |
| 5.176 | 26420407 | 5-Ethyl-1-nonene                                        | 154.172 | 019780-74-6  |
| 5.233 | 9224671  | Cyclopropane, 1-methyl-2-pentyl-                        | 126.141 | 041977-37-1  |
| 5.302 | 4381628  | Undecane                                                | 156.188 | 001120-21-4  |
| 5.569 | 13702974 | Cyclohexane, 1,2-diethyl-1-methyl-                      | 154.172 | 061141-79-5  |
| 5.627 | 4327844  | Cyclopentane, 1,1,3,4-tetramethyl-, trans-              | 126.141 | 020309-77-7  |
| 5.731 | 2594322  | 6-Dodecene, (E)-                                        | 168.188 | 007206-17-9  |
| 5.789 | 23204205 | 1,7-Nonadiene, 4,8-dimethyl-                            | 152.157 | 062108-28-5  |
| 5.931 | 2459770  | 1-Isopropyl-1,4,5-trimethylcyclohexane                  | 168.188 | 219783-06-9  |
| 6.072 | 4971480  | 3-Undecene, 10-methyl-                                  | 168.188 | 1000061-84-5 |
| 6.130 | 5558837  | Cyclododecane                                           | 168.188 | 000294-62-2  |
| 6.203 | 3361726  | Dodecane                                                | 170.203 | 000112-40-3  |
| 6.355 | 4230066  | n.i.                                                    | n.i.    | n.i.         |
| 6.413 | 2365377  | n.i.                                                    | n.i.    | n.i.         |
| 6.491 | 2514145  | Cyclopentane, 1-pentyl-2-propyl-                        | 182.203 | 062199-51-3  |
| 6.523 | 4585596  | Cyclopropane, 1-heptyl-2-methyl-                        | 154.172 | 074663-91-5  |
| 6.596 | 3081553  | 1-Decanol, 2-methyl-                                    | 172.183 | 018675-24-6  |
| 6.733 | 1984915  | Cyclohexane, 1,1,2,3-tetramethyl-                       | 140.157 | 006783-92-2  |
| 6.801 | 1897059  | 2-Butene, 2,3-dimethyl-                                 | 84.094  | 000563-79-1  |
| 6.963 | 5244926  | 4-Isopropylcyclohexanone                                | 140.120 | 005432-85-9  |
| 7.000 | 2501732  | 1-Tridecene                                             | 182.203 | 002437-56-1  |
| 7.147 | 55358557 | 2,3-Dimethyl-3-heptene, (Z)-                            | 126.141 | 059643-73-1  |
| 7.210 | 10125148 | n.i.                                                    | n.i.    | n.i.         |
| 7.288 | 34838028 | 4-Isopropyl-1,3-cyclohexanedione                        | 154.099 | 062831-62-3  |
| 7.508 | 5975896  | 3-Decene, 2,2-dimethyl-, (E)-                           | 168.188 | 055499-02-0  |
| 7.697 | 1590013  | 3-Hexene, 2,2,5,5-tetramethyl-, (Z)-                    | 140.157 | 000692-47-7  |
| 7.739 | 7145426  | Cyclopropanemethanol, 2-methyl-2-(4-methyl-3-pentenyl)- | 168.151 | 098678-70-7  |
| 7.839 | 1928421  | 2-Tetradecene, (E)-                                     | 196.219 | 035953-54-9  |
| 7.881 | 2597807  | Cyclooctane, 1,4-dimethyl-, cis-                        | 140.157 | 013151-99-0  |
| 8.179 | 1847858  | Cyclohexane, 1-ethyl-2-propyl-                          | 154.172 | 062238-33-9  |
| 8.641 | 1248655  | Cyclopentadecane                                        | 210.235 | 000295-48-7  |
| 8.887 | 5755420  | Cyclohexane, 1,2,4-trimethyl-                           | 126.141 | 002234-75-5  |
| 9.091 | 1903747  | n.i.                                                    | n.i.    | n.i.         |
| 9.437 | 2784218  | n.i.                                                    | n.i.    | n.i.         |

**Table S6.** Identified substances after pyrolysis (500°C) of sample 6.

| RT (min) | Area (Ab*s) | Hit Name              | Mol Weight (amu) | CAS Number  |
|----------|-------------|-----------------------|------------------|-------------|
| 1.994    | 15444946    | 1-Butanol, 2-methyl-  | 88.089           | 000137-32-6 |
| 2.057    | 13360762    | n.i.                  | n.i.             | n.i.        |
| 2.141    | 34211078    | 1-Pentene, 2-methyl-  | 84.094           | 000763-29-1 |
| 2.282    | 11150566    | 1H-Pyrrole, 1-methyl- | 81.058           | 000096-54-8 |
| 2.696    | 11799703    | Heptane, 4-methyl-    | 114.141          | 000589-53-7 |

|        |           |                                                             |         |              |
|--------|-----------|-------------------------------------------------------------|---------|--------------|
| 2.985  | 3472211   | 1-Hexene, 3,3,5-trimethyl-                                  | 126.141 | 013427-43-5  |
| 3.179  | 198103392 | 2,4-Dimethyl-1-heptene                                      | 126.141 | 019549-87-2  |
| 3.304  | 5952450   | Cyclohexane, 1,3,5-trimethyl-, (1.alpha.,3.alpha.,5.beta.)- | 126.141 | 001795-26-2  |
| 3.545  | 11836398  | 2-Pentene, 3-methyl-, (Z)-                                  | 84.094  | 000922-62-3  |
| 3.713  | 3922574   | Pyruvic acid, 3-hexenyl ester                               | 170.094 | 1000132-46-3 |
| 4.368  | 5515814   | 1,1,4-Trimethylcyclohexane                                  | 126.141 | 007094-27-1  |
| 4.395  | 5260216   | 1-Hexene, 3,3-dimethyl-                                     | 112.125 | 003404-77-1  |
| 4.494  | 2617017   | Octane, 3,5-dimethyl-                                       | 142.172 | 015869-93-9  |
| 4.531  | 2516226   | Decane, 3,3,8-trimethyl-                                    | 184.219 | 062338-16-3  |
| 5.139  | 22142183  | Cyclohexane, 1,1,3,5-tetramethyl-, cis-                     | 140.157 | 050876-32-9  |
| 5.176  | 12040496  | 3-Heptene, 4-methyl-                                        | 112.125 | 004485-16-9  |
| 5.569  | 4862106   | 2,3-Dimethyl-3-heptene, (Z)-                                | 126.141 | 059643-73-1  |
| 5.627  | 1586774   | 2,3-Dimethyl-3-heptene                                      | 126.141 | 1000113-49-3 |
| 5.789  | 2766651   | 1,7-Nonadiene, 4,8-dimethyl-                                | 152.157 | 062108-28-5  |
| 6.360  | 1639905   | 2-Undecene, 4-methyl-                                       | 168.188 | 091695-32-8  |
| 6.963  | 1428035   | 4-Isopropylcyclohexanone                                    | 140.120 | 005432-85-9  |
| 7.141  | 37479312  | n.i.                                                        | n.i.    | n.i.         |
| 7.283  | 34123971  | Cyclohexane, 1,1-dimethyl-2-propyl-                         | 154.172 | 081983-71-3  |
| 7.514  | 3437142   | 3-Decene, 2,2-dimethyl-, (E)-                               | 168.188 | 055499-02-0  |
| 7.739  | 3268248   | Cyclopropanemethanol, 2-methyl-2-(4-methyl-3-pentenyl)-     | 168.151 | 098678-70-7  |
| 8.892  | 8034954   | Cyclohexane, 1,2,4-trimethyl-                               | 126.141 | 002234-75-5  |
| 9.437  | 1926570   | 1,6-Octadiene, 2,5-dimethyl-, (E)-                          | 138.141 | 068702-25-0  |
| 10.439 | 2045113   | n.i.                                                        | n.i.    | n.i.         |
| 10.627 | 1430770   | Cyclopentane, hexyl-                                        | 154.172 | 004457-00-5  |

**Table S7.** Identified substances after pyrolysis (500°C) of sample 7.

| RT (min) | Area (Ab*s) | Hit Name                                                   | Mol Weight (amu) | CAS Number   |
|----------|-------------|------------------------------------------------------------|------------------|--------------|
| 1.983    | 40548090    | 1-Butanol, 2-methyl-                                       | 88.089           | 000137-32-6  |
| 2.114    | 92886937    | 1-Pentene, 2-methyl-                                       | 84.094           | 000763-29-1  |
| 2.272    | 28771247    | (Z),(Z)-2,4-Hexadiene                                      | 82.078           | 006108-61-8  |
| 2.387    | 9677424     | 1-Heptene                                                  | 98.110           | 000592-76-7  |
| 2.413    | 9077888     | 3-Ethyl-1,3-dimethyldiaziridine (trans)                    | 100.100          | 1000283-16-1 |
| 2.680    | 20901436    | Hexane, 2,3-dimethyl-                                      | 114.141          | 000584-94-1  |
| 2.733    | 4499109     | Heptane, 4-methyl-                                         | 114.141          | 000589-53-7  |
| 2.817    | 25740536    | 2-Octene, (Z)-                                             | 112.125          | 007642-04-8  |
| 2.979    | 9987251     | 1-Hexene, 3,3,5-trimethyl-                                 | 126.141          | 013427-43-5  |
| 3.158    | 292046896   | 2,4-Dimethylhept-1-ene                                     | 126.141          | 1000411-46-2 |
| 3.299    | 13236185    | Cyclohexane, 1,2,4-trimethyl-, (1.alpha.,2.beta.,4.beta.)- | 126.141          | 007667-60-9  |
| 3.467    | 5802667     | 1-Heptene, 2,6-dimethyl-                                   | 126.141          | 003074-78-0  |
| 3.545    | 36287796    | Styrene                                                    | 104.063          | 000100-42-5  |
| 3.708    | 11090170    | Pyruvic acid, 3-hexenyl ester                              | 170.094          | 1000132-46-3 |
| 3.870    | 9660800     | 2-Propenoic acid, 2-methyl-, 2-methylpropyl ester          | 142.099          | 000097-86-9  |
| 4.017    | 4203105     | Camphene                                                   | 136.125          | 000079-92-5  |
| 4.290    | 4125765     | Cyclobutanone, 2,3,3-trimethyl-                            | 112.089          | 028290-01-9  |
| 4.337    | 6290163     | 1-Decene                                                   | 140.157          | 000872-05-9  |
| 4.368    | 9252673     | 2-Undecene, 4-methyl-                                      | 168.188          | 091695-32-8  |

|       |          |                                                                            |         |              |
|-------|----------|----------------------------------------------------------------------------|---------|--------------|
| 4.395 | 10205997 | 1,1,4-Trimethylcyclohexane                                                 | 126.141 | 007094-27-1  |
| 4.531 | 6918788  | Decane, 4-methyl-                                                          | 156.188 | 002847-72-5  |
| 4.945 | 3607918  | Bicyclo[3.1.1]heptan-3-one, 2,6,6-trimethyl-, (1.alpha.,2.beta.,5.alpha.)- | 152.120 | 015358-88-0  |
| 5.081 | 2736795  | 6,11-Dimethyl-2,6,10-dodecatrien-1-ol                                      | 208.183 | 1000196-53-3 |
| 5.134 | 30316886 | Cyclohexane, 1,1,3,5-tetramethyl-, cis-                                    | 140.157 | 050876-32-9  |
| 5.170 | 14604160 | n.i.                                                                       | n.i.    | n.i.         |
| 5.233 | 5511816  | 1-Undecene                                                                 | 154.172 | 000821-95-4  |
| 5.301 | 2901588  | Undecane                                                                   | 156.188 | 001120-21-4  |
| 5.569 | 8247877  | Cyclohexane, 1,1,3,5-tetramethyl-, trans-                                  | 140.157 | 050876-31-8  |
| 5.626 | 2550262  | 2,3-Dimethyl-3-heptene, (Z)-                                               | 126.141 | 059643-73-1  |
| 5.789 | 12127126 | 1,7-Nonadiene, 4,8-dimethyl-                                               | 152.157 | 062108-28-5  |
| 5.925 | 2259054  | 4-Undecene, 2-methyl-, (E)-                                                | 168.188 | 028665-57-8  |
| 6.077 | 2214242  | 5-Undecene, 9-methyl-, (Z)-                                                | 168.188 | 074630-65-2  |
| 6.130 | 4940982  | Cyclopropane, 1-methyl-2-octyl-                                            | 168.188 | 037617-26-8  |
| 6.203 | 1893933  | Dodecane                                                                   | 170.203 | 000112-40-3  |
| 6.355 | 2409474  | Cyclohexane, 2-ethyl-1,3-dimethyl-                                         | 140.157 | 007045-67-2  |
| 6.413 | 1403439  | n.i.                                                                       | n.i.    | n.i.         |
| 6.491 | 953143   | 3-Tridecene, (Z)-                                                          | 182.203 | 041446-53-1  |
| 6.523 | 1352375  | Tridecane, 4-methyl-                                                       | 198.235 | 026730-12-1  |
| 6.963 | 2975238  | 2,6-Octadienal, 3,7-dimethyl-, (Z)-                                        | 152.120 | 000106-26-3  |
| 7.000 | 1823235  | 1-Tridecene                                                                | 182.203 | 002437-56-1  |
| 7.141 | 35793307 | n.i.                                                                       | n.i.    | n.i.         |
| 7.210 | 6000168  | 4-Isopropyl-1,3-cyclohexanedione                                           | 154.099 | 062831-62-3  |
| 7.283 | 21892084 | 4-Decene, 3-methyl-, (E)-                                                  | 154.172 | 062338-47-0  |
| 7.508 | 4033981  | 3-Decene, 2,2-dimethyl-, (E)-                                              | 168.188 | 055499-02-0  |
| 7.739 | 4447710  | Cyclopropanemethanol, 2-methyl-2-(4-methyl-3-pentenyl)-                    | 168.151 | 098678-70-7  |
| 8.892 | 4674981  | n.i.                                                                       | n.i.    | n.i.         |
| 9.437 | 1819277  | 1,6-Octadiene, 2,5-dimethyl-, (E)-                                         | 138.141 | 068702-25-0  |

**Table S8.** Identified substances after pyrolysis (500 °C) of sample 8.

| RT (min) | Area (Ab*s) | Hit Name                                                   | Mol Weight (amu) | CAS Number  |
|----------|-------------|------------------------------------------------------------|------------------|-------------|
| 1.994    | 31926662    | 1-Propene, 2-methyl-3-(1-methylethoxy)-                    | 114.104          | 044744-50-5 |
| 2.057    | 18744694    | 2-Pentene, 4-methyl-                                       | 84.094           | 004461-48-7 |
| 2.140    | 44756411    | 1-Pentene, 2-methyl-                                       | 84.094           | 000763-29-1 |
| 2.277    | 23529152    | n.i.                                                       | n.i.             | n.i.        |
| 2.397    | 44293825    | Methyl methacrylate                                        | 100.052          | 000080-62-6 |
| 2.680    | 19670861    | Hexane, 2,3-dimethyl-                                      | 114.141          | 000584-94-1 |
| 2.738    | 4458709     | Heptane, 4-methyl-                                         | 114.141          | 000589-53-7 |
| 2.817    | 22909762    | 2-Heptene, 5-methyl-                                       | 112.125          | 022487-87-2 |
| 2.979    | 7232580     | 2,2-Dimethyl-3-heptene trans                               | 126.141          | 019550-75-5 |
| 3.173    | 190675910   | 2,4-Dimethyl-1-heptene                                     | 126.141          | 019549-87-2 |
| 3.304    | 8015296     | Cyclohexane, 1,2,4-trimethyl-, (1.alpha.,2.beta.,4.beta.)- | 126.141          | 007667-60-9 |
| 3.535    | 76812576    | Styrene                                                    | 104.063          | 000100-42-5 |
| 3.708    | 4518081     | cis-3-Hexenyllactate                                       | 172.110          | 061931-81-5 |
| 3.750    | 2563789     | n.i.                                                       | n.i.             | n.i.        |
| 4.012    | 3913022     | 5-Eicosene, (E)-                                           | 280.313          | 074685-30-6 |

|       |          |                                              |         |             |
|-------|----------|----------------------------------------------|---------|-------------|
| 4.227 | 34473757 | n-Butyl methacrylate                         | 142.099 | 000097-88-1 |
| 4.311 | 11567033 | .alpha.-Methylstyrene                        | 118.078 | 000098-83-9 |
| 4.368 | 11164667 | 2-Decene, 4-methyl-, (Z)-                    | 154.172 | 074630-30-1 |
| 4.494 | 2337396  | Heptane, 3,3,5-trimethyl-                    | 142.172 | 007154-80-5 |
| 4.531 | 2328785  | Dodecane, 4,6-dimethyl-                      | 198.235 | 061141-72-8 |
| 4.725 | 2003522  | 4-Decene, 5-methyl-, (E)-                    | 154.172 | 062338-51-6 |
| 4.809 | 1741369  | 4-Decene, 2-methyl-, (Z)-                    | 154.172 | 055499-07-5 |
| 4.976 | 5943015  | n.i.                                         | n.i.    | n.i.        |
| 5.134 | 18115353 | Cyclopentane, propyl-                        | 112.125 | 002040-96-2 |
| 5.170 | 10602346 | 6-Dodecene, (E)-                             | 168.188 | 007206-17-9 |
| 5.233 | 5310351  | 3-Undecene, (E)-                             | 154.172 | 001002-68-2 |
| 5.569 | 4261246  | Cyclohexane, 1,1,3,5-tetramethyl-, trans-    | 140.157 | 050876-31-8 |
| 5.789 | 6480543  | 2-Propen-1-one, 1-(2,2-dimethylcyclopropyl)- | 124.089 | 077846-92-5 |
| 6.077 | 1734181  | 5-Undecene, 2-methyl-, (Z)-                  | 168.188 | 074630-63-0 |
| 6.491 | 1836547  | n.i.                                         | n.i.    | n.i.        |
| 6.523 | 1931915  | 2-Undecene, (Z)-                             | 154.172 | 000821-96-5 |
| 6.963 | 1631212  | n.i.                                         | n.i.    | n.i.        |
| 7.136 | 13811618 | 2,3-Dimethyl-3-heptene, (Z)-                 | 126.141 | 059643-73-1 |
| 7.204 | 2585809  | Hexane, 2,3,4-trimethyl-                     | 128.157 | 000921-47-1 |
| 7.283 | 8753582  | 4-Isopropyl-1,3-cyclohexanedione             | 154.099 | 062831-62-3 |

**Table S9.** Identified substances after pyrolysis (500 °C) of sample 9.

| RT (min) | Area (Ab*s) | Hit Name                                                         | Mol Weight (amu) | CAS Number   |
|----------|-------------|------------------------------------------------------------------|------------------|--------------|
| 1.983    | 85467962    | 1-Butanol, 2-methyl-                                             | 88.089           | 000137-32-6  |
| 2.109    | 157073627   | 1-Pentene, 2-methyl-                                             | 84.094           | 000763-29-1  |
| 2.261    | 77757783    | (Z),(Z)-2,4-Hexadiene                                            | 82.078           | 006108-61-8  |
| 2.413    | 45768668    | 2,4-Hexadiene, 2-methyl-                                         | 96.094           | 028823-41-8  |
| 2.665    | 57620291    | Hexane, 2,3-dimethyl-                                            | 114.141          | 000584-94-1  |
| 2.733    | 11683460    | 1,4-Hexadiene, 4-methyl-                                         | 96.094           | 001116-90-1  |
| 2.780    | 30578829    | 1-Heptene, 2-methyl-                                             | 112.125          | 015870-10-7  |
| 2.958    | 33045718    | 2,2-Dimethyl-3-heptene trans                                     | 126.141          | 019550-75-5  |
| 3.168    | 580390756   | 2,4-Dimethyl-1-heptene                                           | 126.141          | 019549-87-2  |
| 3.283    | 31413648    | Cyclohexane, 1,3,5-trimethyl-, (1.alpha.,3.alpha.-pha.,5.beta.)- | 126.141          | 001795-26-2  |
| 3.393    | 10705583    | 2,4-Heptadiene, 2,4-dimethyl-                                    | 124.125          | 074421-05-9  |
| 3.456    | 12457795    | Cyclohexene, 3,3,5-trimethyl-                                    | 124.125          | 000503-45-7  |
| 3.524    | 47933422    | 2-Pentene, 3-methyl-, (Z)-                                       | 84.094           | 000922-62-3  |
| 3.614    | 8149237     | Bicyclo[3.1.1]heptan-2-one, 6,6-dimethyl-, (1R)-                 | 138.104          | 038651-65-9  |
| 3.697    | 23838494    | Pyruvic acid, 3-hexenyl ester                                    | 170.094          | 1000132-46-3 |
| 3.954    | 3617685     | Cyclobutane, butyl-                                              | 112.125          | 013152-44-8  |
| 4.017    | 6481929     | cis-3-Decene                                                     | 140.157          | 019398-86-8  |
| 4.279    | 4253017     | 2-Methyl-1-nonene                                                | 140.157          | 002980-71-4  |
| 4.363    | 44439992    | 2-Decene, 4-methyl-, (Z)-                                        | 154.172          | 074630-30-1  |
| 4.489    | 7586297     | Hexane, 3,3-dimethyl-                                            | 114.141          | 000563-16-6  |
| 4.526    | 7517474     | Heptane, 5-ethyl-2-methyl-                                       | 142.172          | 013475-78-0  |
| 4.720    | 3462266     | 4-Undecene, (Z)-                                                 | 154.172          | 000821-98-7  |
| 4.756    | 2440328     | 2-Undecene, 4-methyl-                                            | 168.188          | 091695-32-8  |
| 4.798    | 3619693     | 1-Ethyl-2,2,6-trimethylcyclohexane                               | 154.172          | 071186-27-1  |



|       |          |                                                                            |         |              |
|-------|----------|----------------------------------------------------------------------------|---------|--------------|
| 4.851 | 5483541  | 1-Undecene, 7-methyl-                                                      | 168.188 | 074630-42-5  |
| 4.950 | 10577725 | Cyclohexane, hexyl-                                                        | 168.188 | 004292-75-5  |
| 4.997 | 3848291  | Bicyclo[3.1.1]heptan-3-one, 2,6,6-trimethyl-, (1.alpha.,2.beta.,5.alpha.)- | 152.120 | 015358-88-0  |
| 5.081 | 4033861  | 6-Octenoic acid, 3,7-dimethyl-, 3,7-dimethyl-6-octenyl ester               | 308.272 | 082766-40-3  |
| 5.139 | 64049666 | n.i.                                                                       | n.i.    | n.i.         |
| 5.176 | 30803712 | 4-Dodecene                                                                 | 168.188 | 002030-84-4  |
| 5.228 | 5980826  | Cyclopropane, 1-methyl-2-pentyl-                                           | 126.141 | 041977-37-1  |
| 5.301 | 2657828  | Undecane                                                                   | 156.188 | 001120-21-4  |
| 5.537 | 4168161  | Cyclopentane, 1-ethyl-1-methyl-                                            | 112.125 | 016747-50-5  |
| 5.569 | 22096954 | Cyclohexane, 1,1,3,5-tetramethyl-, trans-                                  | 140.157 | 050876-31-8  |
| 5.653 | 2523471  | 4-Dodecene, (E)-                                                           | 168.188 | 007206-15-7  |
| 5.726 | 2954759  | Cyclooctane, 1,2-dimethyl-                                                 | 140.157 | 013151-94-5  |
| 5.789 | 24330573 | 1,7-Nonadiene, 4,8-dimethyl-                                               | 152.157 | 062108-28-5  |
| 5.810 | 4952639  | 4-Dodecanol                                                                | 186.198 | 010203-32-4  |
| 5.925 | 2905767  | Cyclohexanecarboxylic acid, 4-propyl-, 4-cyanophenyl ester, trans-         | 271.157 | 062439-33-2  |
| 6.072 | 3647569  | 5-Undecene, 2-methyl-, (Z)-                                                | 168.188 | 074630-63-0  |
| 6.124 | 3949228  | Cyclododecane                                                              | 168.188 | 000294-62-2  |
| 6.355 | 8358366  | 1-Hexene, 3,3-dimethyl-                                                    | 112.125 | 003404-77-1  |
| 6.449 | 2394812  | 4,8-Decadienal, 5,9-dimethyl-                                              | 180.151 | 000762-26-5  |
| 6.491 | 2198753  | Carbonic acid, decyl tridecyl ester                                        | 384.360 | 1000383-16-2 |
| 6.523 | 5160007  | Cyclohexane, 2-butyl-1,1,3-trimethyl-                                      | 182.203 | 054676-39-0  |
| 6.591 | 2843592  | Carbonic acid, octadecyl prop-1-en-2-yl ester                              | 354.313 | 1000383-11-5 |
| 6.733 | 2438106  | Cyclopentane, 1-butyl-2-propyl-                                            | 168.188 | 062199-50-2  |
| 6.801 | 1311728  | 1-Octene, 3,7-dimethyl-                                                    | 140.157 | 004984-01-4  |
| 6.885 | 3729895  | (E)-4-Oxohex-2-enal                                                        | 112.052 | 1000374-04-2 |
| 6.963 | 5934153  | 4-Hexen-1-ol, 5-methyl-2-(1-methylethenyl)-, (R)-                          | 154.136 | 000498-16-8  |
| 7.031 | 2144282  | 2-Dodecene, 2-methyl-                                                      | 182.203 | 055103-82-7  |
| 7.094 | 2377160  | Cyclohexane, propyl-                                                       | 126.141 | 001678-92-8  |
| 7.147 | 69007014 | 2,3-Dimethyl-3-heptene, (Z)-                                               | 126.141 | 059643-73-1  |
| 7.210 | 13027762 | 2-Acetylcyclopentanone                                                     | 126.068 | 001670-46-8  |
| 7.288 | 43369262 | 4-Isopropyl-1,3-cyclohexanedione                                           | 154.099 | 062831-62-3  |
| 7.477 | 1947993  | Cyclobutanecarboxylic acid, undec-2-enyl ester                             | 252.209 | 1000299-13-6 |
| 7.508 | 7659468  | 3-Decene, 2,2-dimethyl-, (E)-                                              | 168.188 | 055499-02-0  |
| 7.697 | 2099849  | Cyclohexane, 3-ethyl-5-methyl-1-propyl-                                    | 168.188 | 1000151-39-5 |
| 7.739 | 8945912  | n.i.                                                                       | n.i.    | n.i.         |
| 7.881 | 1953495  | 11-Dodecen-1-ol, 2,4,6-trimethyl-, (R,R,R)-                                | 226.230 | 027829-54-5  |
| 8.179 | 2068521  | Cyclopropane, 1,1-dimethyl-2-nonyl-                                        | 196.219 | 041977-38-2  |
| 8.892 | 6329159  | Cyclohexane, 1,1,2-trimethyl-                                              | 126.141 | 007094-26-0  |
| 9.097 | 2124044  | n.i.                                                                       | n.i.    | n.i.         |

**Table S10.** Identified substances after pyrolysis (500°C) of sample 10.

| RT (min) | Area (Ab*s) | Hit Name             | Mol Weight (amu) | CAS Number  |
|----------|-------------|----------------------|------------------|-------------|
| 1.988    | 29015074    | 1-Butanol, 2-methyl- | 88.089           | 000137-32-6 |
| 2.062    | 20266048    | 1-Pentene, 3-methyl- | 84.094           | 000760-20-3 |
| 2.125    | 56338912    | 1-Pentene, 2-methyl- | 84.094           | 000763-29-1 |

|        |           |                                                                              |         |              |
|--------|-----------|------------------------------------------------------------------------------|---------|--------------|
| 2.271  | 23880907  | (Z),(Z)-2,4-Hexadiene                                                        | 82.078  | 006108-61-8  |
| 2.675  | 22226200  | Hexane, 2,3-dimethyl-                                                        | 114.141 | 000584-94-1  |
| 2.738  | 5969997   | Heptane, 4-methyl-                                                           | 114.141 | 000589-53-7  |
| 2.780  | 10104374  | 2-Heptene, 6-methyl-                                                         | 112.125 | 073548-72-8  |
| 2.979  | 12068419  | 2,2-Dimethyl-3-heptene trans                                                 | 126.141 | 019550-75-5  |
| 3.163  | 350342700 | 2,4-Dimethylhept-1-ene                                                       | 126.141 | 1000411-46-2 |
| 3.294  | 14547545  | Cyclohexane, 1,3,5-trimethyl-, (1.alpha.,3.alpha.,5.beta.)-                  | 126.141 | 001795-26-2  |
| 3.398  | 4088645   | 1,2,4,4-Tetramethylcyclopentene                                              | 124.125 | 065378-76-9  |
| 3.467  | 4755322   | Cyclohexene, 3,3,5-trimethyl-                                                | 124.125 | 000503-45-7  |
| 3.535  | 23337867  | 2-Pentene, 3-methyl-, (Z)-                                                   | 84.094  | 000922-62-3  |
| 3.703  | 10327325  | 3-Hexen-1-ol, acetate, (E)-                                                  | 142.099 | 003681-82-1  |
| 4.368  | 21554658  | 2-Decene, 4-methyl-, (Z)-                                                    | 154.172 | 074630-30-1  |
| 4.489  | 4655153   | Decane, 2,8,8-trimethyl-                                                     | 184.219 | 1000060-81-2 |
| 4.526  | 4498845   | Octane, 3,3-dimethyl-                                                        | 142.172 | 004110-44-5  |
| 4.725  | 1443034   | 4-Decene, 5-methyl-, (E)-                                                    | 154.172 | 062338-51-6  |
| 4.803  | 1387883   | Nonane, 2-methyl-3-methylene-                                                | 154.172 | 055499-08-6  |
| 4.950  | 4344887   | 1,7-Octadiene, 2,3,3-trimethyl-                                              | 152.157 | 1000150-47-7 |
| 4.997  | 1676624   | Bicyclo[3.1.1]heptan-3-one, 2,6,6-trimethyl-, (1.alpha.,2.alpha.,5.alpha.)-  | 152.120 | 000547-60-4  |
| 5.081  | 1871306   | 4-Nonene, 2,3,3-trimethyl-, (Z)-                                             | 168.188 | 063830-68-2  |
| 5.139  | 37194761  | n.i.                                                                         | n.i.    | n.i.         |
| 5.170  | 18808937  | n.i.                                                                         | n.i.    | n.i.         |
| 5.228  | 2440402   | Cyclopropane, 1-heptyl-2-methyl-                                             | 154.172 | 074663-91-5  |
| 5.537  | 1339010   | 1-Cyclohexylheptene                                                          | 180.188 | 114614-83-4  |
| 5.569  | 9353697   | 2,3-Dimethyl-3-heptene, (Z)-                                                 | 126.141 | 059643-73-1  |
| 5.626  | 2784599   | Cyclohexane, 1,1,3,5-tetramethyl-, trans-                                    | 140.157 | 050876-31-8  |
| 5.789  | 14623878  | 1,7-Nonadiene, 4,8-dimethyl-                                                 | 152.157 | 062108-28-5  |
| 5.925  | 1553261   | n.i.                                                                         | n.i.    | n.i.         |
| 6.072  | 1344106   | 4-Undecene, 2-methyl-, (E)-                                                  | 168.188 | 028665-57-8  |
| 6.292  | 605850    | Cyclohexane, 2,4-diethyl-1-methyl-                                           | 154.172 | 061142-70-9  |
| 6.355  | 4754799   | 1-Hexene, 3,3-dimethyl-                                                      | 112.125 | 003404-77-1  |
| 6.491  | 1185188   | Cyclohexane, 1,2,4-trimethyl-                                                | 126.141 | 002234-75-5  |
| 6.523  | 2677980   | Decane, 2-methyl-                                                            | 156.188 | 006975-98-0  |
| 6.596  | 1314949   | Nonane, 3-methyl-5-propyl-                                                   | 184.219 | 031081-18-2  |
| 6.732  | 1288192   | Cyclooctane, 1-methyl-3-propyl-                                              | 168.188 | 255885-37-1  |
| 6.884  | 1522520   | Cyclohexanecarbonyl chloride                                                 | 146.050 | 002719-27-9  |
| 6.963  | 2170345   | Cyclopropanecarboxaldehyde, 2-methyl-2-(4-methyl-3-pentenyl)-, trans-(+.-.)- | 166.136 | 097231-35-1  |
| 7.031  | 1297750   | 1-Cyclohexyl-2-methyl-prop-2-en-1-one                                        | 152.120 | 025183-82-8  |
| 7.141  | 43866543  | n.i.                                                                         | n.i.    | n.i.         |
| 7.209  | 9167398   | n.i.                                                                         | n.i.    | n.i.         |
| 7.283  | 28594049  | 4-Isopropyl-1,3-cyclohexanedione                                             | 154.099 | 062831-62-3  |
| 7.508  | 4524819   | 3-Decene, 2,2-dimethyl-, (E)-                                                | 168.188 | 055499-02-0  |
| 7.739  | 5888500   | Cyclohexane, 1,1,3,5-tetramethyl-, cis-                                      | 140.157 | 050876-32-9  |
| 8.184  | 1097946   | Cyclopentane, 1-butyl-2-propyl-                                              | 168.188 | 062199-50-2  |
| 8.892  | 4361830   | n.i.                                                                         | n.i.    | n.i.         |
| 9.097  | 1523164   | 1-Undecene, 7-methyl-                                                        | 168.188 | 074630-42-5  |
| 9.442  | 1537635   | 1,6-Octadiene, 2,5-dimethyl-, (E)-                                           | 138.141 | 068702-25-0  |
| 10.438 | 1343690   | Cyclooctane, butyl-                                                          | 168.188 | 016538-93-5  |

**Table S11.** Identified substances after pyrolysis (500 °C) of sample 11.

| RT (min) | Area (Ab*s) | Hit Name                         | Mol Weight (amu) | CAS Number  |
|----------|-------------|----------------------------------|------------------|-------------|
| 1.994    | 5530753     | 1,3-Butadiene                    | 54.047           | 000106-99-0 |
| 2.046    | 3365582     | 2-Pentene, (E)-                  | 70.078           | 000646-04-8 |
| 2.172    | 17705640    | 1-Hexene                         | 84.094           | 000592-41-6 |
| 2.418    | 15454227    | 1-Heptene                        | 98.110           | 000592-76-7 |
| 2.549    | 2293026     | Cyclohexane, methyl-             | 98.110           | 000108-87-2 |
| 2.859    | 6426957     | 1-Octene                         | 112.125          | 000111-66-0 |
| 2.906    | 5512039     | Octane                           | 114.141          | 000111-65-9 |
| 3.456    | 1295243     | 1,8-Nonadiene                    | 124.125          | 004900-30-5 |
| 3.519    | 6146285     | 1-Nonene                         | 126.141          | 000124-11-8 |
| 3.577    | 3999540     | Nonane                           | 128.157          | 000111-84-2 |
| 4.274    | 1153833     | 1,9-Decadiene                    | 138.141          | 001647-16-1 |
| 4.342    | 13712916    | 1-Decene                         | 140.157          | 000872-05-9 |
| 4.410    | 3612347     | Decane                           | 142.172          | 000124-18-5 |
| 5.165    | 1032489     | 1,10-Undecadiene                 | 152.157          | 013688-67-0 |
| 5.233    | 9383561     | Cyclopropane, 1-methyl-2-pentyl- | 126.141          | 041977-37-1 |
| 5.307    | 4486711     | Undecane                         | 156.188          | 001120-21-4 |
| 6.072    | 1089075     | 1,11-Dodecadiene                 | 166.172          | 005876-87-9 |
| 6.135    | 5851250     | 1-Dodecene                       | 168.188          | 000112-41-4 |
| 6.203    | 4530114     | Dodecane                         | 170.203          | 000112-40-3 |
| 6.963    | 776054      | 1,13-Tetradecadiene              | 194.203          | 021964-49-8 |
| 7.016    | 4127532     | 1-Tridecene                      | 182.203          | 002437-56-1 |
| 7.073    | 3306911     | Tridecane                        | 184.219          | 000629-50-5 |
| 7.859    | 3621011     | 2-Tetradecene, (E)-              | 196.219          | 035953-54-9 |
| 7.907    | 2582932     | Tetradecane                      | 198.235          | 000629-59-4 |
| 8.662    | 1598319     | 1-Pentadecene                    | 210.235          | 013360-61-7 |
| 8.703    | 1706322     | Pentadecane                      | 212.250          | 000629-62-9 |
| 9.453    | 1362194     | 1-Decanol, 2-octyl-              | 270.292          | 045235-48-1 |
| 10.203   | 410585      | 1-Decanol, 2-hexyl-              | 242.261          | 002425-77-6 |

**Table S12.** Identified substances after pyrolysis (500 °C) of sample 12.

| RT (min) | Area (Ab*s) | Hit Name                         | Mol Weight (amu) | CAS Number  |
|----------|-------------|----------------------------------|------------------|-------------|
| 1.899    | 15793435    | 1,3-Butadiene                    | 54.047           | 000106-99-0 |
| 2.041    | 13942496    | 2-Propenenitrile                 | 53.027           | 000107-13-1 |
| 2.298    | 10342312    | Benzene                          | 78.047           | 000071-43-2 |
| 2.754    | 164800549   | Toluene                          | 92.063           | 000108-88-3 |
| 3.116    | 23651592    | Cyclohexene, 4-ethenyl-          | 108.094          | 000100-40-3 |
| 3.325    | 31308921    | Benzene, 1,3-dimethyl-           | 106.078          | 000108-38-3 |
| 3.619    | 2422495166  | Styrene                          | 104.063          | 000100-42-5 |
| 3.834    | 1469926     | 1,3,5,7-Cyclooctatetraene        | 104.063          | 000629-20-9 |
| 4.012    | 9768539     | Benzene, 2-propenyl-             | 118.078          | 000300-57-2 |
| 4.075    | 3301278     | 1,3,5-Cycloheptatriene, 7-ethyl- | 120.094          | 017634-51-4 |
| 4.316    | 67328304    | .alpha.-Methylstyrene            | 118.078          | 000098-83-9 |
| 4.405    | 3861713     | (Z)-1-Phenylpropene              | 118.078          | 000766-90-5 |
| 4.714    | 12138494    | Benzene, 1-propenyl-             | 118.078          | 000637-50-3 |
| 4.861    | 3944921     | Benzene, 3-butenyl-              | 132.094          | 000768-56-9 |

|        |          |                                                                                    |         |              |
|--------|----------|------------------------------------------------------------------------------------|---------|--------------|
| 4.908  | 2252128  | Indene                                                                             | 116.063 | 000095-13-6  |
| 4.982  | 4937939  | Benzene, (1-methylenepropyl)-                                                      | 132.094 | 002039-93-2  |
| 5.301  | 574389   | Benzene, (2-methyl-3-butenyl)-                                                     | 146.110 | 001647-06-9  |
| 5.758  | 2684427  | Benzene, (1-methylenebutyl)-                                                       | 146.110 | 005676-32-4  |
| 5.883  | 4554356  | Bicyclo[4.2.0]oct-1-ene, 7-exo-ethenyl-                                            | 134.110 | 1000142-18-2 |
| 5.957  | 2106957  | Benzene, 3-pentenyl-                                                               | 146.110 | 001745-16-0  |
| 6.104  | 2163323  | Cyclohexane, 1,5-diethenyl-3-methyl-2-methylene-,<br>(1.alpha.,3.alpha.,5.alpha.)- | 162.141 | 074742-35-1  |
| 6.544  | 3257288  | Benzene, 1-hexynyl-                                                                | 158.110 | 001129-65-3  |
| 7.477  | 649602   | Benzene, 3-cyclohexen-1-yl-                                                        | 158.110 | 004994-16-5  |
| 9.243  | 2848125  | Benzene, 1,1'-(1-methyl-1,2-ethanediyl)bis-                                        | 196.125 | 005814-85-7  |
| 10.512 | 11004363 | n.i.                                                                               | n.i.    | n.i.         |
